# Supplementary material for: Carbon dots with wide-spectrum absorption for enhanced anti-aging of poly(vinyl chloride) films
Source: Royal Society of Chemistry journal article supplement (doi:10.1039/d5tb00162e), 2025-01-01
Supplement: d5tb00162e1.pdf [file d5tb00162e1.pdf]

## Supporting Information

### **Carbon Dots with Wide-Spectrum Absorption for Enhanced Anti-Aging of Poly(vinyl chloride) Films**

Chen Dong <sup>a,b,\*</sup>, Zijian Li <sup>b</sup>, Hong Bi <sup>b</sup>, Changyong Gaon <sup>c,\*</sup> and Xuehua Ma <sup>c,\*</sup>

<sup>a</sup> *Centre for the Protection of Cultural Property, Ningbo University of Finance & Economics, Ningbo 315175, China*

<sup>b</sup> *School of Materials Science and Engineering, Anhui University, Hefei 230601, China*

<sup>c</sup> *Laboratory of Advanced Theranostic Materials and Technology, Ningbo Key Laboratory of Biomedical Imaging Probe Materials and Technology, Chinese Academy of Sciences (CAS) Key Laboratory of Magnetic Materials and Devices, Ningbo Institute of Materials Technology and Engineering, Chinese Academy of Sciences, Ningbo 315201, China*

\*Corresponding Authors

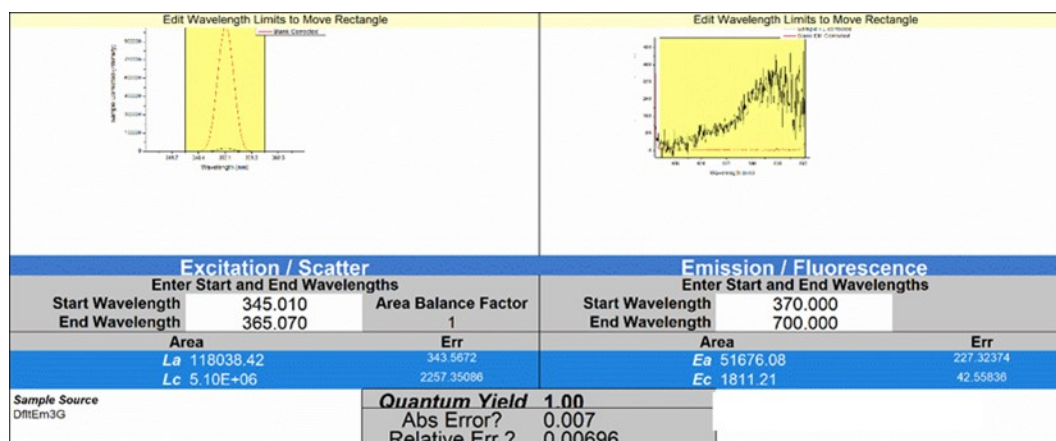

**Figure S1.** Absolute fluorescence quantum yield of gm-CDs solution.

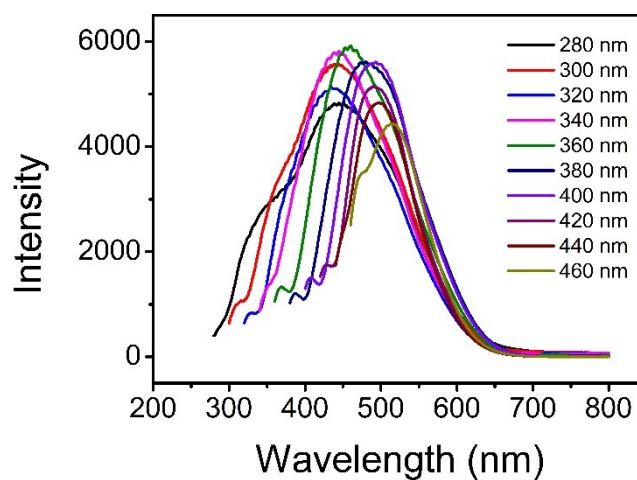

**Figure S2.** PL emission spectra with different excitation wavelengths of gm-CDs solution.

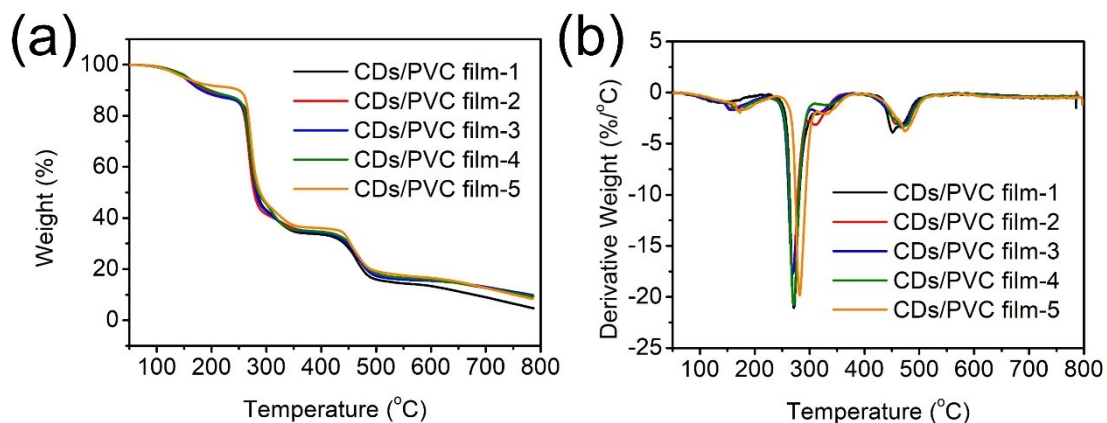

**Figure S3.** (a) Thermogravimetric analysis and (b) derivative thermogravimetric analysis thermograms of CDs/PVC composite films with the heating rate of  $10\text{ }^{\circ}\text{C min}^{-1}$  under  $\text{N}_2$  atmosphere.

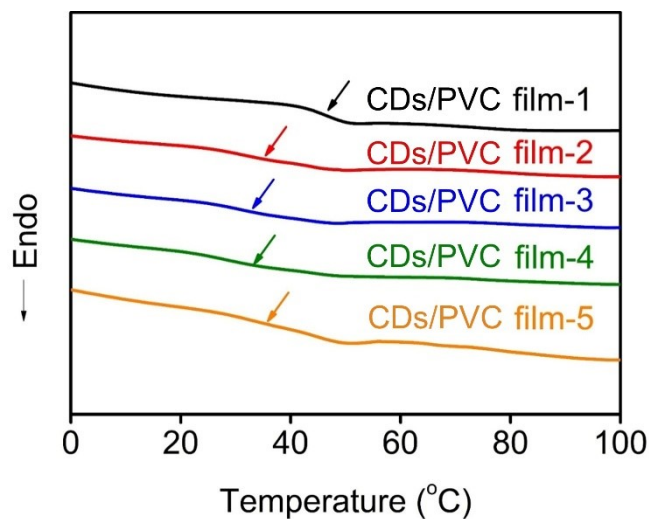

**Figure S4.** Differential scanning calorimetry thermograms of CDs/PVC composite films with the heating rate of  $10\text{ }^{\circ}\text{C min}^{-1}$  under  $\text{N}_2$  atmosphere.

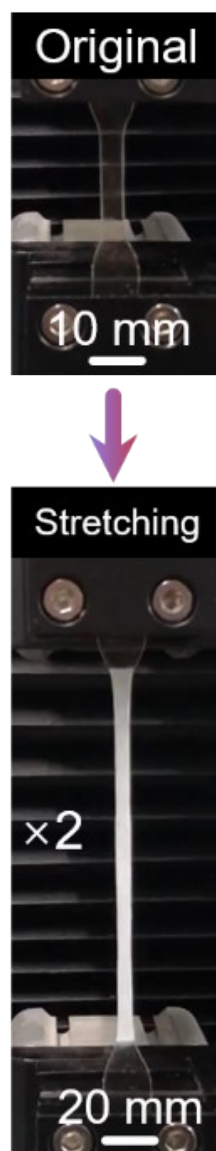

**Figure S5.** Tensile photographs of PVC film without gm-CDs.
